# Supplementary material
Source: HighWire-hosted journal article supplement (https://erj.ersjournals.com/content/58/3/2100839)
Supplement: inline-supplementary-material-1 [file inline-supplementary-material-1.pdf]

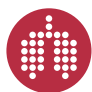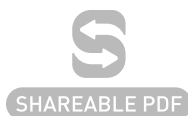

# Outbreak of pre- and extensively drug-resistant tuberculosis in northern Italy: urgency of cross-border, multidimensional, surveillance systems

Simone Villa <sup>1,6</sup>, Elisa Tagliani <sup>2,6</sup>, Emanuele Borroni<sup>2</sup>, Paola Francesca Castellotti<sup>3</sup>, Maurizio Ferrarese<sup>3</sup>, Arash Ghodousi<sup>2</sup>, Anna Lamberti<sup>4</sup>, Sabrina Senatore<sup>4</sup>, Marino Faccini<sup>4,7</sup>, Daniela Maria Cirillo <sup>2,7</sup> and Luigi Ruffo Codecasa<sup>5,7</sup>

<sup>1</sup>Centre for Multidisciplinary Research in Health Science, University of Milan, Milan, Italy. <sup>2</sup>Emerging Bacterial Pathogens Unit, Division of Immunology, Transplantation and Infectious Diseases, IRCCS San Raffaele Scientific Institute, Milan, Italy. <sup>3</sup>Regional TB Reference Centre, Villa Marelli Institute and Laboratory/ASST Niguarda, Milan, Italy. <sup>4</sup>Health Protection Agency, Metropolitan Area of Milan, Milan, Italy. <sup>5</sup>Regional TB Reference Centre, Villa Marelli Institute, ASST Niguarda, Milan, Italy. <sup>6</sup>Co-first author (equally contributed). <sup>7</sup>Co-last author (equally contributed).

Daniela Maria Cirillo ([cirillo.daniela@hsr.it](mailto:cirillo.daniela@hsr.it))

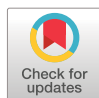

Shareable abstract (@ERSpublications)

**An outbreak of (pre-)extensively drug-resistant tuberculosis was detected in Northern Italy using whole genome sequencing and epidemiological study. This experience suggests that integrated and cross-border surveillance systems should be urgently employed.** <https://bit.ly/3wtQkBp>

**Cite this article as:** Villa S, Tagliani E, Borroni E, *et al.* Outbreak of pre- and extensively drug-resistant tuberculosis in northern Italy: urgency of cross-border, multidimensional, surveillance systems. *Eur Respir J* 2021; 58: 2100839 [DOI: 10.1183/13993003.00839-2021].

This single-page version can be shared freely online.

Copyright ©The authors 2021. For reproduction rights and permissions contact [permissions@ersnet.org](mailto:permissions@ersnet.org)

Received: 22 March 2021  
Accepted: 11 May 2021

## To the Editor:

Multidrug-resistant (MDR) and extensively drug-resistant (XDR) tuberculosis (TB) are a major public health threat because of reduced treatment options and poor patient outcomes. New antimicrobials and regimens have been developed in recent years, but their effectiveness has been hampered by the rise and spread of drug-resistant strains. Whole genome sequencing (WGS) has emerged as a tool able to revolutionise TB surveillance and the clinical management of TB. This approach is now widely used by public health agencies in detecting outbreaks and transmission chains, thus supporting the formulation of evidence-based health policies. Moreover, WGS can predict the drug-susceptibility profile of *Mycobacterium tuberculosis* complex (MTBC) strains, often in combination with phenotypic antimicrobial susceptibility testing (AST) and minimum inhibitory concentration (MIC) determination for the optimal clinical management of drug-resistant TB [1].
